# Supplementary material for: Sex-dependent effects of a high fat diet on metabolic disorders, intestinal barrier function and gut microbiota in mouse
Source: PubMed Central journal article supplement — Sci Rep. 2024 Aug 27;14:19835. doi: 10.1038/s41598-024-70931-4 (PMC11349972; doi:10.1038/s41598-024-70931-4), 2024-08-27
Supplement: 41598_2024_70931_MOESM1_ESM.pdf [file 41598_2024_70931_MOESM1_ESM.pdf]

**SUPPLEMENTAL TABLES**

**Table S1. Primer sequences for qPCR.**

| RT-qPCR in colonic tissue |                                |               |                                 |
|---------------------------|--------------------------------|---------------|---------------------------------|
| Gene                      | Primer sequences               | Gene          | Primer sequences                |
| <i>Ifng</i>               | Fw: ATGAACGCTACACACTGCATC      | <i>TNFA</i>   | Fw: CACCGTCAGCCGATTTGC          |
|                           | Rv: CCATCCTTTTGCCAGTTCCTC      |               | Rv: TGAGTTGGTCCCCCTTCTCC        |
| <i>Il1b</i>               | Fw: GAAGAAGAGCCCATCCTCTGT      | <i>Il4</i>    | Fw: GAGAGAGATCATCGGCATTTTGA     |
|                           | Rv: TGTTTCATCTCGGAGCCTGTA      |               | Rv: TTCGTTGCTGTGAGGACGTTT       |
| <i>Il6</i>                | Fw: ACTCCCAACAGACCTGTCTATACCA  | <i>Il10</i>   | Fw: ATAAGCTCCAAGACCAAGGTGTCT    |
|                           | Rv: TGCCATTGCACAACCTCTTTTCT    |               | Rv: ACACACTGCAGGTGTTTTAGCTTTT   |
| <i>Ccl2</i>               | Fw: AAGCTGTAGTTTTTGTCCACCAAGCT | <i>Cldn3</i>  | Fw: GCGGCTCTGCTCACCTTAGTAC      |
|                           | Rv: TTGGTTCCGATCCAGGTTTTTA     |               | Rv: GGCACCAACGGGTTATAGAAATC     |
| <i>Ocln</i>               | Fw: AAGCGATCATACCCAGAGTCTTTC   | <i>Cxcl1</i>  | Fw: GCACCCAAACCGAAGTCATA        |
|                           | Rv: CACACTCAAGGTCAGAGGAATCTC   |               | Rv: CTTGGGGACACCTTTTAGCA        |
| <i>Cxcr3</i>              | Fw: GCACCAGCCAAGCCATGT         | <i>TLR4</i>   | Fw: TTCTTCTCCTGCCTGACACCA       |
|                           | Rv: CAAAGTCCGAGGCATCTAGCA      |               | Rv: GGAATGTCATCAGGGACTTTGC      |
| <i>Myd88</i>              | Fw: GACCCCACTCGCAGTTTGTT       | <i>NFKB</i>   | Fw: TTTCGACTACGCAGTGACGG        |
|                           | Rv: TTCTGGCAGTCTCCTCGAT        |               | Rv: GAGCGTGGAGGTGGATGATG        |
| <i>IRF3</i>               | Fw: ACAAAGAAGGGGGTTGCGTG       | <i>Cldn15</i> | Fw: TCTCTCCAAGAAGGCCAAGCT       |
|                           | Rv: TTCCATGCTCTAGCCAGGGG       |               | Rv: TGACGGCGTACCACGAGATAG       |
| <i>Marveld2</i>           | Fw: GCTGTGTTCCAAGACCAGTTTTTC   | <i>Tjp1</i>   | Fw: GAGAAGCTGGATTCTTAAGACCTGTA  |
|                           | Rv: GTGTTCTCGGCGTTTTTCAG       |               | Rv: AGTCCCAGCATCTCGTGGTT        |
| <i>Tjp2</i>               | Fw: CGGATGCTCGGAAGTTAATAGAA    | <i>Tjp3</i>   | Fw: GAGAACGTCACATCTGCCTTTG      |
|                           | Rv: CCGAGATATCTCCACTTCAGAGT    |               | Rv: TCACTGTAACGTTGGCTGTTTTG     |
| <i>F11r</i>               | Fw: AATACTACTGCCAGGCCAGAAT     | <i>IGSF5</i>  | Fw: TCCAGGAGAGAAAAGGAAGAATCTACT |
|                           | Rv: AGCTCCACAGCATCCATGTGT      |               | Rv: TCCGGATCTGCTTTGTTTGTC       |
| <i>Cldn1</i>              | Fw: TCCCATAGTCTCCTGTTTCTGA     | <i>GAPDH</i>  | Fw: CATGGCCTTCCGTTCTCTA         |
|                           | Rv: GGTCATCGGGAAAACATCATCT     |               | Rv: CCTGCTTACCACCTTCTTGA        |
| <i>Cldn4</i>              | Fw: CTCTGAGTTCCTCCCTTTGC       | <i>Cldn5</i>  | Fw: TCAGCTTCCCGGTCAAGTACTC      |
|                           | Rv: CGTACCTTCCCTCCGCACT        |               | Rv: CGCCCTTAGACATAGTTCTTCTTGT   |
| <i>Cldn8</i>              | Fw: GACAGCCATCCTCGGAATGA       | <i>Cldn11</i> | Fw: CTAGCTCAGTTAATGCCACATAGTT   |
|                           | Rv: GATGCGGCTCTTACGTTCT        |               | Rv: CCCGAGGAAAGAGCAAACAG        |
| <i>Cldn2</i>              | Fw: TCCTCGCTGGCTTGTATTATCTCT   | <i>Cldn7</i>  | Fw: GCATGTTCTGGATTGGTCAT        |
|                           | Rv: TCGAGAATCCTGGCAGAACAC      |               | Rv: TAACGTTTCATGGGCGTCAAG       |
| <i>Cldn12</i>             | Fw: GCAGTGAAGACAGCATATTGAACA   | <i>B2m</i>    | Fw: TGGCTCACACTGAATTCACCCCA     |
|                           | Rv: AATCATCGGAGTCAATGCACAA     |               | Rv: TCTCGATCCCAGTAGACGGTCTTGG   |
| <i>Cgn</i>                | Fw: CCAGGTGAAGGAGCTACAGCTTA    | <i>MLCK</i>   | Fw: GTGAGCATCAAAGATACCCTGATCT   |
|                           | Rv: CGGGTGTCTAACAAGTCTTTAGG    |               | Rv: CGACCCCTCCTAAGACTTCAT       |

|                                  |                               |               |                                 |
|----------------------------------|-------------------------------|---------------|---------------------------------|
| <i>TLR2</i>                      | Fw: GAATTGCATCACCGGTCAGAA     | <i>NOD2</i>   | Fw: GCTCAGCCTGGTAGGAAACAA       |
|                                  | Rv: CCTCTGAGATTTGACGCTTTGTC   |               | Rv: CTTCGTCACAGATATGGTTTTCTCTA  |
| <i>Nfkbia</i>                    | Fw: TGGCCAGTGTAGCAGTCTTGAC    | <i>Ticam1</i> | Fw: AAAGCAGTGGCCTATTACAAGTCA    |
|                                  | Rv: CGTGTGGCCATTGTAGTTGGT     |               | Rv: GACGTGGTGTCTGCAGAGAATC      |
| <i>CD14</i>                      | Fw: GCCTTTCTCGGAGCCTATCTG     | <i>actb</i>   | Fw: AGGTCATCACTATTGGCAACGA      |
|                                  | Rv: CAACAGCAACAAGCCAAGCA      |               | Rv: CACAGGATTCCATACCCAAGAAG     |
| <i>GCG</i>                       | Fw: TCAACTGGCTGATTCAAACCAA    | <i>GIP</i>    | Fw: CCGACAACAAGACTTCGTGAAC      |
|                                  | Rv: GGCACGAGATGTTGTGAAGATG    |               | Rv: TGTTGTGTTTCCAGTCACTCTTCTTC  |
| <i>YY</i>                        | Fw: GGCAGCGGTATGGAAAAAGA      | <i>S100A8</i> | Fw: GAGTGTCTCAGTTTTGTGCAGAATATA |
|                                  | Rv: TCTGTGAAGAGCAGTTTGGAGAAC  |               | Rv: GGAACTCCTCGAAGTTAATTGCAT    |
| <i>S100A9</i>                    | Fw: ACAAATGGTGAAGCACAGTTG     | <i>FABP2</i>  | Fw: ACCGGAACGAGAAGTATGAAAAGT    |
|                                  | Rv: GTCATTTATGAGGGCTTCATTTCTC |               | Rv: TCCAAGCTTCTCTTCATCACA       |
| <i>TGFb</i>                      | Fw: TGGAGCAACATGTGGAAGCTC     | <i>Tfrc</i>   | Fw: GAGGCGCTTCTAGTACTCCCTTGT    |
|                                  | Rv: CAGCAGCCGGTTACCAAG        |               | Rv: GCCGAGCAAGGCTAAACCGGG       |
| <b>RT-qPCR in adipose tissue</b> |                               |               |                                 |
| Gene                             | Primer sequences              | Gene          | Primer sequences                |
| <i>B2m</i>                       | Fw: GCCGAACATACTGAACTGCTAC    | <i>RPS18</i>  | Fw: TGCGAGTACTCAACACCAACA       |
|                                  | Rv: GCTGAAGAACATATCTGACATCTC  |               | Rv: TTCCTCAACACCACATGAGC        |
| <i>TNF</i>                       | Fw: TGTCTACTCCTCAGAGCCCC      | <i>Il6</i>    | Fw: CACTTCACAAGTCGGAGGCT        |
|                                  | Rv: TGAGTCCTTGATGGTGGTGC      |               | Rv: CTGCAAGTGCATCATCGTTGT       |
| <i>Ccl2</i>                      | Fw: TTAAAAACCTGGATCGGAACCAA   | <i>Lep</i>    | Fw: TCGGTTCTGTGGCTTTGGT         |
|                                  | Rv: GCATTAGCTTCAGATTTACGGGT   |               | Rv: CTCTGCTTGCGGATAACCGA        |
| <i>Retn</i>                      | Fw: GTCTCCTCCAGAGGGAAGTTGG    | <i>Adipoq</i> | Fw: TGACGACACCAAAGGGCTC         |
|                                  | Rv: CACGCTCACTTCCCCGAAT       |               | Rv: ACCTGCACAAGTTCCCTTGG        |

Fw: Forward primer; Rv, Reverse primer, Ifng: Interferon gamma, Il1b :Interleukin 1 beta, Il6 :Interleukin 6, Ccl2: C-C motif Chemokine ligand 2, Ocln: Occludin, Cxcr3: C-X-C motif chemokine receptor 3, Myd88: Myeloid differentiation primary response 88, IRF3: Interferon regulatory factor 3, Marvel2: Marvel domain-containing protein 2, Tjp2: Tight junction protein 2, F11r: F11 receptor, Cldn1: Claudin 1, Cldn4: Claudin 4, Cldn8: Claudin 8, Cldn2: Claudin 2, Cldn12: Claudin 12, Cgn: Cingulin, TLR2: Toll-like receptor 2, Nfkbia: Nuclear factor kappa B inhibitor alpha, CD14: CD14 antigen, GCG: Glucagon, YY: Peptide YY, S100A9: S100 calcium-binding protein A9, TGFb: Transforming growth factor beta, TNFa: Tumor necrosis factor alpha, Il4: Interleukin 4, Il10: Interleukin 10, Cldn3: Claudin 3, Cxcl1: C-X-C motif chemokine ligand 1, TLR4: Toll-like receptor 4, NFKB: Nuclear factor kappa B, Cldn15: Claudin 15, Tjp1: Tight junction protein 1, Tjp3: Tight junction protein 3, IGSF5: Immunoglobulin superfamily member 5, GAPDH: Glyceraldehyde-3-phosphate dehydrogenase, Cldn5: Claudin 5, Cldn11: Claudin 11, Cldn7: Claudin 7, B2m: Beta-2-microglobulin, MLCK: Myosin light chain kinase, NOD2: Nucleotide-binding oligomerization domain-containing protein 2, Ticam1: TIR domain-containing adapter molecule 1, actb: Beta-actin, GIP: Gastric inhibitory polypeptide, S100A8: S100 calcium-binding protein A8, FABP2: Fatty acid-binding protein 2, Tfrc: Transferrin receptor, B2m: Beta-2-Microglobulin, RPS18: Ribosomal Protein S18, Lep: Leptin, Retn: Resistin, Adipoq: Adiponectin.
